# Supplementary material for: A Critical Review of Risk Assessment Models for Listeria monocytogenes in Produce
Source: Preprints.org preprint supplement (doi:10.20944/preprints202402.1293.v1), 2024-02-22
Supplement: Supplementary file 1 [file supplementary]

## Sheet: Feuil1
Table S1: Accessibility to listeriosis QRA published models for seafood products
Model	Language	Sharing opportunity	Access to code
Ding et al [11]	@Risk	Not specified
Carrasco et al [12]	@Risk	Not specified
Crépet [13]	R	Not specified
Guzel [14]	@Risk	Not specified
Omac et al. [15]	@Risk	Not specified
Franz et al. [16]	@Risk	Not specified
Sant'Ana et al. [17]	@Risk	Not specified
Tromp et al. [18]	Same model as Franz et al. [16] but moxe complex logistics of the products prepared with ALADIN software	Not specified
FDA-FSIS [19]	Excel Visual Basic	Yes	The modelling software was initially on the JIFSAN clearinghouse website (http://www.foodriskclearinghouse.umd.edu)
Doménech et al. [20]	@Risk	Not specified
Zoellner et al. [21]	@Risk	The model is available upon request from the corresponding author
EFSA BIOHAZ [22]	R	The R-code of the mgQMRA model and the inputs (in Excel files containing tables) have been made available through the Knowledge Junction	https://doi.org/10.5281/zenodo.3725608.
